# Supplementary material
Source: Elsevier journal article supplement (https://www.sciencedirect.com/science/article/pii/S0001731020301289)
Supplement: mmc1 [file S0001731020301289:mmc1.pdf]

**Material complementario I.** Guion simple de apoyo para la realización de la entrevista semi-estructurada

|                                                                                                                                                                                                                                                                                                                                         |                                                                                                                                                                                                                                                                                               |
|-----------------------------------------------------------------------------------------------------------------------------------------------------------------------------------------------------------------------------------------------------------------------------------------------------------------------------------------|-----------------------------------------------------------------------------------------------------------------------------------------------------------------------------------------------------------------------------------------------------------------------------------------------|
| <p>1. Tratamiento</p> <p>a) Tipo de tratamiento<br/>b) Adherencia al tratamiento<br/>c) Dificultades para seguirlo<br/>d) Percepción de su efectividad<br/>e) Cómo le hace sentir</p>                                                                                                                                                   | <p>2. Apoyos y recursos sociales</p> <p>a) De la familia<br/>b) De los amigos/pareja<br/>c) De las instituciones<br/>d) De médicos y especialistas<br/>e) Económicos<br/>f) Conocimiento sobre otros recursos<br/>g) Percepción de si son suficientes<br/>h) De qué otras formas ayudarle</p> |
| <p>3. Autopercepción sobre la enfermedad</p> <p>a) Preocupaciones<br/>b) Aspecto visible de la enfermedad<br/>c) Rechazo social de la sociedad<br/>d) Aislamiento<br/>e) Situaciones de crisis</p>                                                                                                                                      | <p>4. Descanso y sueño</p> <p>a) Cómo pasa las noches<br/>b) Qué hace para conciliar el sueño<br/>c) Cómo le repercute en sus relaciones y trabajo</p>                                                                                                                                        |
| <p>5. Trabajo</p> <p>a) Cómo le afecta en su rendimiento laboral<br/>b) Cómo lo ven sus compañeros y jefes<br/>c) Limitaciones y/o adaptaciones en las actividades</p>                                                                                                                                                                  | <p>6. Relaciones sociales</p> <p>a) Cómo le afecta en su entorno familiar<br/>b) Carga familiar<br/>c) Cómo le afecta con sus amigos y pareja</p>                                                                                                                                             |
| <p>7. Búsqueda de la mejora</p> <p>a) Qué situaciones le gustaría mejorar<br/>b) Dónde cree que puede mejorar<br/>c) Grupos de autoayuda<br/>d) Escuela de Dermatitis Atópica<br/>e) Más apoyo profesional<br/>f) Búsqueda de información en libros, Internet y Redes sociales<br/>g) Tratamientos alternativos<br/>h) Alimentación</p> | <p>8. Sociedad</p> <p>a) Contacto con otros afectados<br/>b) Concienciación de la sociedad sobre la problemática<br/>c) Iniciativas, noticias o proyectos relacionados</p>                                                                                                                    |

## Material complementario II. Frecuencia de categorías por entrevista

|                                  | P1 | P2 | P3 | P4  | P5 | P6 | P7 | P8 | P9 | P10 | P11 | P12 | P13 | P14 | TOTAL |
|----------------------------------|----|----|----|-----|----|----|----|----|----|-----|-----|-----|-----|-----|-------|
| Concienciación y sensibilización | 0  | 3  | 0  | 3   | 1  | 1  | 3  | 1  | 4  | 1   | 0   | 3   | 1   | 1   | 22    |
| Economía y trabajo               | 5  | 0  | 5  | 1   | 2  | 3  | 0  | 10 | 10 | 0   | 8   | 4   | 0   | 4   | 52    |
| Emociones y autovalía            | 5  | 3  | 14 | 24  | 4  | 14 | 7  | 6  | 12 | 5   | 4   | 13  | 3   | 3   | 117   |
| Precauciones y limitaciones      | 4  | 5  | 8  | 19  | 18 | 12 | 17 | 25 | 10 | 5   | 16  | 31  | 3   | 6   | 179   |
| Rechazo social y estigmatización | 0  | 0  | 2  | 22  | 0  | 5  | 13 | 4  | 11 | 2   | 13  | 16  | 0   | 1   | 89    |
| Relaciones con los profesionales | 6  | 9  | 4  | 17  | 5  | 18 | 3  | 4  | 4  | 2   | 20  | 9   | 1   | 6   | 108   |
| Relaciones sociales              | 3  | 10 | 1  | 23  | 10 | 7  | 5  | 3  | 12 | 4   | 1   | 5   | 0   | 1   | 85    |
| Situaciones de crisis            | 0  | 3  | 4  | 7   | 1  | 0  | 0  | 0  | 0  | 0   | 0   | 2   | 1   | 2   | 20    |
| Tratamiento                      | 14 | 5  | 12 | 11  | 10 | 15 | 10 | 8  | 8  | 4   | 4   | 16  | 8   | 9   | 134   |
| Vivencia de la enfermedad        | 7  | 5  | 1  | 29  | 10 | 12 | 10 | 8  | 15 | 2   | 9   | 8   | 5   | 4   | 125   |
| TOTAL                            | 44 | 43 | 51 | 156 | 61 | 87 | 68 | 69 | 86 | 25  | 75  | 107 | 22  | 37  | 931   |
